# Supplementary material for: Cations mediating proton conductivity in an oxalate based microporous coordination polymer
Source: Royal Society of Chemistry journal article supplement (doi:10.1039/c8nj04763d), 2018-11-16
Supplement: c8nj04763d1.pdf [file c8nj04763d1.pdf]

**Cations mediating proton conductivity in an oxalate based microporous coordination polymer**

Xing Meng,<sup>\*a</sup> Hai-Ning Wang,<sup>a</sup> Xiao-Kun Wang,<sup>b</sup> Long-Zhang Dong<sup>b</sup> and Yan-Hong Zou<sup>a</sup>

*<sup>a</sup>School of Chemistry and Chemical Engineering, Shandong University of Technology, Zibo, Shandong, 255049, P. R. China.*

*<sup>b</sup>Jiangsu Collaborative Innovation Centre of Biomedical Functional Materials, Jiangsu Key Laboratory of New Power Batteries, College of Chemistry and Materials Science, Nanjing Normal University, Nanjing 210023, P. R. China.*

\* Corresponding author

E-mail: mengxing@sdut.edu.cn

## ***Experimental Section***

### ***Materials and Measurements***

All starting materials and solvents were reagent grade, commercially available and used without further purification. Elemental analyses (C, H and N) were performed on a Perkin-Elmer 2400 CHN elemental analyzer. Powder X-ray diffraction (PXRD) were recorded on a Siemens D5005 diffractometer with Cu K $\alpha$  ( $\lambda = 1.5418 \text{ \AA}$ ) radiation. The amount of Ca and Zr was determined by inductively coupled plasma atomic emission spectrometer (ICP-AES).

### ***Synthetic procedures***

**Synthesis of compound  $\text{Ca}_2\text{Zr}(\text{C}_2\text{O}_4)_4 \cdot 5.5\text{H}_2\text{O}$  (1):** According to the report procedure,<sup>1</sup> a solution containing  $9 \times 10^{-3}$  mol of oxalic acid dihydrate was introduced dropwise to 20 mL of an aqueous solution containing  $\text{CaCl}_2$  ( $4.5 \times 10^{-3}$  mol) and  $\text{ZrCl}_4$  ( $1.5 \times 10^{-3}$  mol). The solution was heated a few minutes at 90 °C, under stirring, and 30 mL of water were added to slow down the evaporation. After cooling, the solution was filtered off and the white precipitate was washed with water and ethanol and dried at room temperature.

### **The preparation of $1@NH_4^+$**

Then about 0.500 g of samples **1** was added to 5 mol/L of  $\text{NH}_4\text{Cl}$  in a solution containing 20 ml of water. The contents were placed in a 20 ml screw-capped vial, which was heated to 45 °C in the water bath for 12 h. A white precipitate was obtained by filtration and washed with water for several times to remove excess  $\text{NH}_4\text{Cl}$ . The solid was then dried overnight under vacuum condition.

The thermal behaviours were studied by TGA. The experiments were performed under a  $\text{N}_2$  atmosphere with a heating rate of  $10 \text{ }^\circ\text{C min}^{-1}$  in temperatures ranging from room temperature to 800 °C (Fig. S1). The weight loss 16.88% in the temperature range

of 31-278 °C corresponds to the departure of  $\text{NH}_3$  in  $\text{NH}_4^+$  and water molecules (found: 16.88% calc: 16.76%).

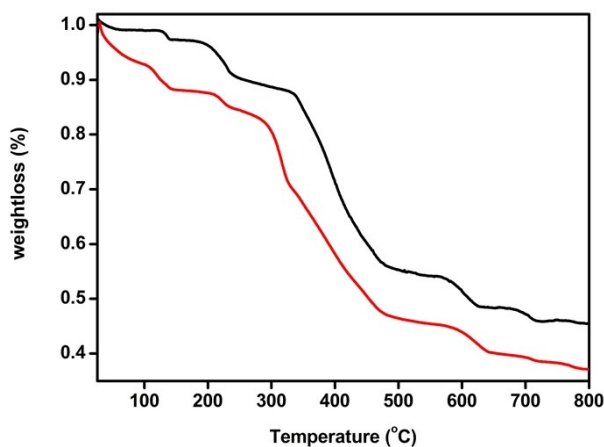

**Fig. S1** Thermogravimetric analyses of **1** (black) and **1@NH<sub>4</sub><sup>+</sup>** (red).

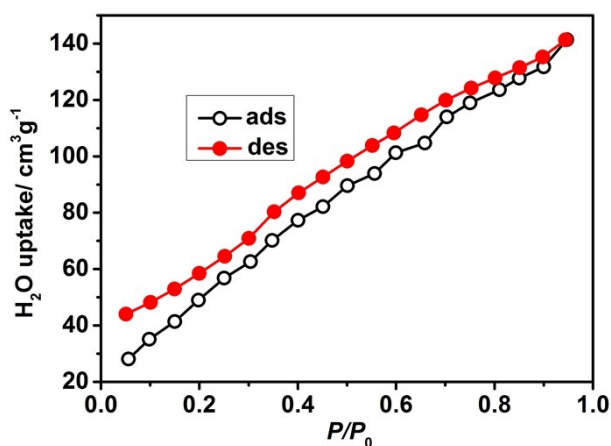

**Fig. S2** Water vapor adsorption and desorption isotherms for **1@NH<sub>4</sub><sup>+</sup>**.

### ***Proton conductivity measurements***

The samples were put into a homemade mould with a radius of 0.2 cm to get circular pellets. The thickness was measured by a vernier caliper. And then the pellets were smeared by silver colloid on two sides which were fixed on the sample stage with gold wires. The proton conductivities were measured using an impedance/gain-phase analyzer (Solartron S1 1260) over a frequency range from 0.1 Hz to 1 MHz with an input voltage of 3000 mV. The temperature and relative humidity are controlled by

using an XK-CTS80Z incubator. ZSimpWin software was used to extrapolate impedance data results by means of an equivalent circuit simulation to complete the Nquist plot and obtain the resistance values. The proton conductivity was calculated using the following equation: □

$$\sigma = L / RS$$

where  $\sigma$  is the conductivity ( $S\text{ cm}^{-1}$ ),  $L$  is the measured sample thickness (cm),  $S$  is the electrode area ( $\text{cm}^2$ ) and  $R$  is the impedance ( $\Omega$ ).

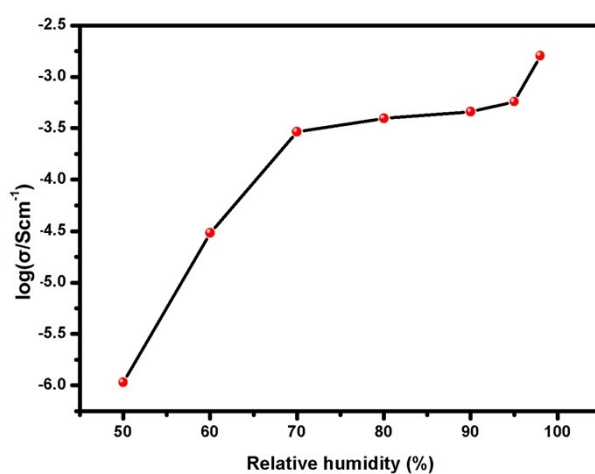

**Fig. S3** Proton conductivity ( $\log(\sigma/S\text{ cm}^{-1})$ ) of  $1@NH_4^+$  at  $30^\circ\text{C}$  with different RHs.

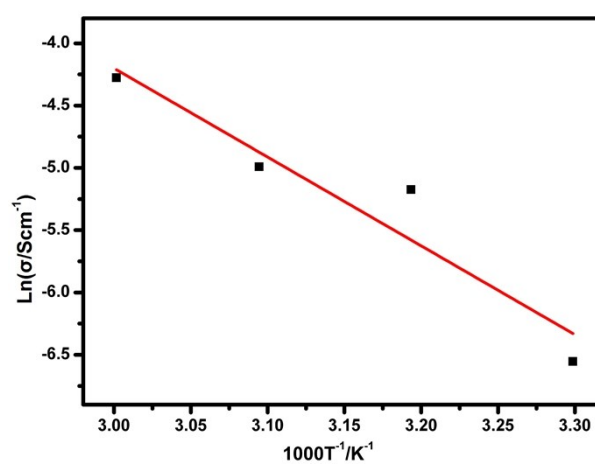

**Fig. S4** Arrhenius plot of the proton conductivities of compound  $1@NH_4^+$  at 98% RH.

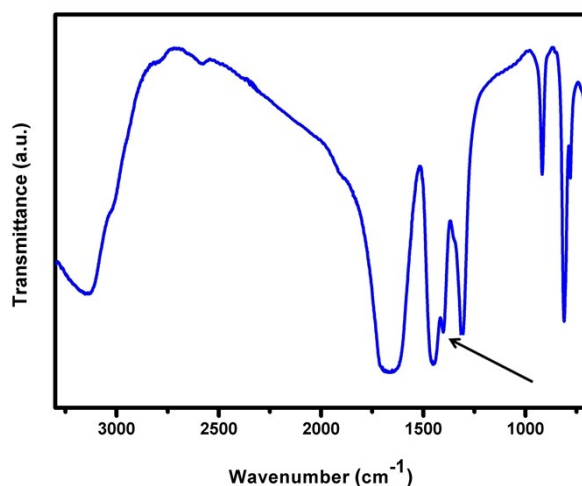

**Fig. S5** FTIR spectrum of  $1@NH_4^+$  after AC impedance measurement.

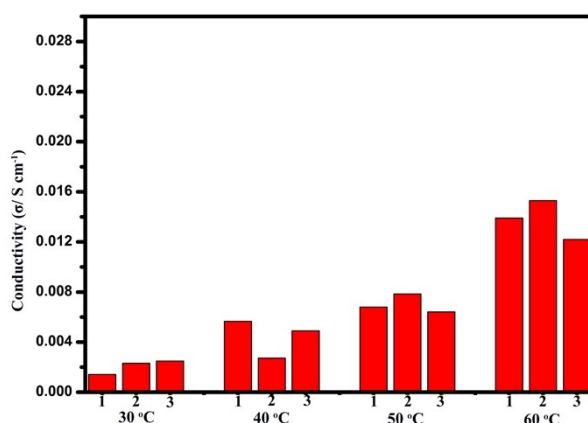

**Fig. S6** The proton conductivities ( $S\text{ cm}^{-1}$ ) cycle of  $1@NH_4^+$  with 98% RH under different temperatures.

**Table S1** The proton conductivities ( $S\text{ cm}^{-1}$ ) of  $1@NH_4^+$  at 30°C with different RHs.

| Relative humidity (%) | Conductivity<br>( $S\text{ cm}^{-1}$ ) |
|-----------------------|----------------------------------------|
| 50% RH                | $1.07 \times 10^{-6}$                  |
| 60% RH                | $3.05 \times 10^{-5}$                  |
| 70% RH                | $2.93 \times 10^{-4}$                  |
| 80% RH                | $3.93 \times 10^{-4}$                  |
| 90% RH                | $4.57 \times 10^{-4}$                  |
| 95% RH                | $5.73 \times 10^{-4}$                  |

98% RH

 $1.42 \times 10^{-3}$ **Table S2** The proton conductivities ( $\text{S cm}^{-1}$ ) of  $\mathbf{1@NH_4^+}$  with 98% RH under different temperatures.

| Temperature ( $^{\circ}\text{C}$ ) | First cycle<br>Conductivity<br>( $\text{S cm}^{-1}$ ) | Second cycle<br>Conductivity<br>( $\text{S cm}^{-1}$ ) | Third cycle<br>Conductivity<br>( $\text{S cm}^{-1}$ ) |
|------------------------------------|-------------------------------------------------------|--------------------------------------------------------|-------------------------------------------------------|
| 30 $^{\circ}\text{C}$              | $1.42 \times 10^{-3}$                                 | $2.32 \times 10^{-3}$                                  | $2.49 \times 10^{-3}$                                 |
| 40 $^{\circ}\text{C}$              | $5.66 \times 10^{-3}$                                 | $2.72 \times 10^{-3}$                                  | $4.91 \times 10^{-3}$                                 |
| 50 $^{\circ}\text{C}$              | $6.80 \times 10^{-3}$                                 | $7.85 \times 10^{-3}$                                  | $6.41 \times 10^{-3}$                                 |
| 60 $^{\circ}\text{C}$              | $1.39 \times 10^{-2}$                                 | $1.53 \times 10^{-2}$                                  | $1.22 \times 10^{-2}$                                 |

**Table S3** Proton conductivities ( $> 10^{-2} \text{ S cm}^{-1}$ ) of selected MOFs.

| Compounds                                                                                  | Conductivity<br>( $\text{S cm}^{-1}$ ) | Experimental<br>condition                                                                                                            | Ref.      |
|--------------------------------------------------------------------------------------------|----------------------------------------|--------------------------------------------------------------------------------------------------------------------------------------|-----------|
| This work                                                                                  | $1.39 \times 10^{-2}$                  | 60 $^{\circ}\text{C}$ and 98% RH                                                                                                     | This work |
| $\text{Zn}_3(\text{bpdc})_2(\text{pdc})(\text{DMF}) \cdot 6\text{DMF}$                     | $0.95 \times 10^{-2}$                  | 60 $^{\circ}\text{C}$ and 97% RH                                                                                                     | 2         |
| Im-Fe-MOF                                                                                  | $1.21 \times 10^{-2}$                  | 60 $^{\circ}\text{C}$ and 98% RH                                                                                                     | 3         |
| BUT-83                                                                                     | $3.9 \times 10^{-2}$                   | 80 $^{\circ}\text{C}$ and 97% RH                                                                                                     | 4         |
| BUT-8(Cr)A                                                                                 | $1.27 \times 10^{-1}$                  | 80 $^{\circ}\text{C}$ and 100% RH                                                                                                    | 5         |
| BUT-8(Cr)                                                                                  | $4.63 \times 10^{-2}$                  | 80 $^{\circ}\text{C}$ and 100% RH                                                                                                    | 5         |
| MIL-101-SO <sub>3</sub> H                                                                  | $1.16 \times 10^{-2}$                  | 80 $^{\circ}\text{C}$ and 100% RH                                                                                                    | 5         |
| $\{[\text{Co}_3(\text{m-ClPhIDC})_2(\text{H}_2\text{O})_6] \cdot 2\text{H}_2\text{O}\}_n$  | $2.89 \times 10^{-2}$                  | 100 $^{\circ}\text{C}$ ; water and<br>aqua-ammonia<br>vapors ( $\text{NH}_3 \cdot \text{H}_2\text{O}$<br>concentration of 7.40<br>M) | 6         |
| $\{[\text{Co}_3(\text{p-ClPhHIDC})_3(\text{H}_2\text{O})_3] \cdot 6\text{H}_2\text{O}\}_n$ | $4.25 \times 10^{-2}$                  | 100 $^{\circ}\text{C}$ ; water and<br>aqua-ammonia<br>vapors ( $\text{NH}_3 \cdot \text{H}_2\text{O}$<br>concentration of 7.40<br>M) | 6         |
| UiO-66(-SO <sub>3</sub> H) <sub>2</sub>                                                    | $8.4 \times 10^{-2}$                   | 80 $^{\circ}\text{C}$ and 90% RH                                                                                                     | 7         |
| TfOH@MIL-101                                                                               | $8 \times 10^{-2}$                     | 60 $^{\circ}\text{C}$ and 15% RH                                                                                                     | 8         |
| Fe-CAT-5                                                                                   | $5 \times 10^{-2}$                     | 25 $^{\circ}\text{C}$ and 98% RH                                                                                                     | 9         |
| $[(\text{Me}_2\text{NH}_2)_3(\text{SO}_4)]_2[\text{Zn}_2(\text{ox})_3]_n$                  | $4.2 \times 10^{-2}$                   | 80 $^{\circ}\text{C}$ and 95% RH                                                                                                     | 10        |
| PCMOF-10                                                                                   | $3.55 \times 10^{-2}$                  | 70 $^{\circ}\text{C}$ and 95% RH                                                                                                     | 11        |

|                                                                                                    |                       |                     |    |
|----------------------------------------------------------------------------------------------------|-----------------------|---------------------|----|
| VNU-15                                                                                             | $2.90 \times 10^{-2}$ | 95 °C and 60% RH    | 12 |
| H <sup>+</sup> @Ni <sub>2</sub> (dobdc)(H <sub>2</sub> O) <sub>2</sub> (pH = 1.8)                  | $2.2 \times 10^{-2}$  | 80 °C and 95% RH    | 13 |
| PCMOF2 <sub>1/2</sub>                                                                              | $2.1 \times 10^{-2}$  | 85 °C and 90% RH    | 14 |
| [ImH][Cu(HPO <sub>4</sub> ) <sub>1.5</sub> (HPO <sub>4</sub> ) <sub>0.5</sub> ·Cl <sub>0.5</sub> ] | $2.0 \times 10^{-2}$  | 130 °C and 0 RH     | 15 |
| HOF-GS-11                                                                                          | $1.8 \times 10^{-2}$  | 30 °C and 95% RH    | 16 |
| H <sub>3</sub> PO <sub>4</sub> @MIL-101                                                            | $1.0 \times 10^{-2}$  | 140 °C and 1.1% RH  | 17 |
| H <sub>2</sub> SO <sub>4</sub> @MIL-101                                                            | $1.0 \times 10^{-2}$  | 150 °C and 0.13% RH | 18 |
|                                                                                                    |                       | RH                  |    |
| CsHSO <sub>4</sub> @Cr-MIL-101                                                                     | $10^{-2}$             | 200 °C and 0 RH     | 18 |
| (NH <sub>4</sub> ) <sub>2</sub> (adp)[Zn <sub>2</sub> (ox) <sub>3</sub> ]·3H <sub>2</sub> O        | $10^{-2}$             | ambient temperature | 19 |

**Table S4** ICP-AES results of the compound **1** and **1**@NH<sub>4</sub><sup>+</sup>

| Compounds                              | Ca (umol/mL) | Zr (umol/mL) | the reduction of calcium in 1<br>mol sample (mol) |
|----------------------------------------|--------------|--------------|---------------------------------------------------|
| <b>1</b>                               | 5.464        | 2.57         | 0.14723004                                        |
| <b>1</b> @NH <sub>4</sub> <sup>+</sup> | 4.676        | 2.363        |                                                   |

## References

1. N. Audebrand, E. Jeanneau, T. Bataille, S. Raite, D. Louër, A family of microporous mixed oxalates with isotypic-framework structures based on eight-coordinate metals, *Solid State Sciences*, 2004, **6**, 579-591.
2. X. Meng, M. J. Wei, H. N. Wang, H. Y. Zang, Z. Y. Zhou, Multifunctional luminescent Zn(II)-based metal-organic framework for high proton-conductivity and detection of Cr<sup>3+</sup> ions in the presence of mixed metal ions, *Dalton Trans.*, 2018, **47**, 1383-1387.
3. F. M. Zhang, L. Z. Dong, J. S. Qin, W. Guan, J. Liu, S. L. Li, M. Lu, Y. Q. Lan, Z. M. Su, H. C. Zhou, Effect of Imidazole Arrangements on Proton-Conductivity in Metal-Organic Frameworks, *J. Am. Chem. Soc.*, 2017, **139**, 6183-6189.
4. H. Wu, F. Yang, X. L. Lv, B. Wang, Y. Z. Zhang, M. J. Zhao, J. R. Li, A stable porphyrinic metal-organic framework pore-functionalized by high-density carboxylic groups for proton conduction, *J. Mater. Chem. A*, 2017, **5**, 14525-14529.
5. F. Yang, G. Xu, Y. B. Dou, B. Wang, H. Zhang, H. Wu, W. Zhou, J. R. Li, B. L. Chen, A

- flexible metal-organic framework with a high density of sulfonic acid sites for proton conduction, *Nature Energy*, 2017, **2**, 877-883.
6. X. Liang, B. Li, M. Wang, J. Wang, R. Liu, G. Li, Effective Approach to Promoting the Proton Conductivity of Metal-Organic Frameworks by Exposure to Aqua-Ammonia Vapor, *ACS Appl. Mater. Interfaces*, 2017, **9**, 25082-25086.
  7. W. Phang, H. Jo, W. Lee, J. Song, K. Yoo, B. Kim, C. Hong, Superprotonic Conductivity of a UiO-66 Framework Functionalized with Sulfonic Acid Groups by Facile Postsynthetic Oxidation, *Angew. Chem. Int. Ed.*, 2015, **54**, 5142-5146.
  8. D. N. Dybtsev, V. G. Ponomareva, S. B. Aliev, A. P. Chupakhin, M. R. Gallyamov, N. K. Moroz, B. A. Kolesov, K. A. Kovalenko, E. S. Shutova, V. P. Fedin, High Proton Conductivity and Spectroscopic Investigations of Metal-Organic Framework Materials Impregnated by Strong Acids, *ACS Appl. Mater. Interfaces*, 2014, **6**, 5161-5167.
  9. N. T. Nguyen, H. Furukawa, F. Gandara, C. A. Trickett, H. M. Jeong, K. E. Cordova, O. M. Yaghi, Three-Dimensional Metal-Catecholate Frameworks and Their Ultrahigh Proton Conductivity, *J. Am. Chem. Soc.*, 2015, **137**, 15394-15397.
  10. S. S. Nagarkar, S. M. Unni, A. Sharma, S. Kurungot, S. K. Ghosh, Two-in-One: Inherent Anhydrous and Water-Assisted High Proton Conduction in a 3D Metal-Organic Framework, *Angew. Chem. Int. Ed.*, 2014, **53**, 2638-2642.
  11. P. Ramaswamy, N. E. Wong, B. S. Gelfand, G. K. Shimizu, A Water Stable Magnesium MOF That Conducts Protons over  $10^{-2}$  S  $\text{cm}^{-1}$ , *J. Am. Chem. Soc.*, 2015, **137**, 7640-7643.
  12. T.-N. Tu, N. Q. Phan, T.-T. Vu, H. L. Nguyen, K. E. Cordova, H. Furukawa, High proton conductivity at low relative humidity in an anionic Fe-based metal-organic framework, *J. Mater. Chem. A*, 2016, **4**, 3638-3641.
  13. W. J. Phang, W. R. Lee, K. Yoo, D. W. Ryu, B. Kim, C. S. Hong, pH-Dependent Proton Conducting Behavior in a Metal-Organic Framework Material, *Angew. Chem. Int. Ed.*, 2014, **53**, 8383-8387.
  14. S. Kim, K. W. Dawson, B. S. Gelfand, J. M. Taylor, G. K. Shimizu, Enhancing Proton Conduction in a Metal-Organic Framework by Isomorphous Ligand Replacement, *J. Am. Chem. Soc.*, 2013, **135**, 963-966.



15. S. Horike, W. Chen, T. Itakura, M. Inukai, D. Umeyama, H. Asakura, S. Kitagawa, Order-to-disorder structural transformation of a coordination polymer and its influence on proton conduction, *Chem. Commun.*, 2014, **50**, 10241-10243.
16. A. Karmakar, R. Illathvalappil, B. Anothumakkool, A. Sen, P. Samanta, A. V. Desai, S. Kurungot, S. K. Ghosh, Hydrogen-Bonded Organic Frameworks (HOFs): A New Class of Porous Crystalline Proton-Conducting Materials, *Angew. Chem. Int. Ed.*, 2016, **55**, 10667-10671.
17. V. G. Ponomareva, K. A. Kovalenko, A. P. Chupakhin, D. N. Dybtsev, E. S. Shutova, V. P. Fedin, Imparting High Proton Conductivity to a Metal-Organic Framework Material by Controlled Acid Impregnation, *J. Am. Chem. Soc.*, 2012, **134**, 15640-15643.
18. V. G. Ponomareva, K. A. Kovalenko, A. P. Chupakhin, E. S. Shutova, V. P. Fedin, CsHSO<sub>4</sub>-Proton conduction in a crystalline metal-organic framework, *Solid State Ionics*, 2012, **225**, 420-423.
19. M. Sadakiyo, T. Yamada, H. Kitagawa, Rational Designs for Highly Proton-Conductive Metal-Organic Frameworks, *J. Am. Chem. Soc.*, 2009, **131**, 9906-9907.
